# Supplementary material
Source: MDPI journal article supplement (https://www.mdpi.com/2297-8739/9/3/59)
Supplement: s1 [file s1]

## Article

# Research and Application of In Situ Sample-Processing Methods for Rapid Simultaneous Detection of Pyrethroid Pesticides in Vegetables

Bo Mei, Weiyi Zhang, Meilian Chen, Xia Wang, Min Wang, Yinqing Ma, Chunyan Zhu, Bo Deng, Hongkang Wang, Siwen Shen, JinRong Tong, Mengfeng Gao, Yiyi Han \* and Dongsheng Feng \*

Food Quality Supervision, Inspection and Testing Center of the Ministry of Agriculture and Rural Affairs (Shanghai), Shanghai Center of Agricultural Products Quality Safety, Shanghai 201708, China; mebal1990@163.com (B.M.); zhangharewei@163.com (W.Z.); 13601975089@163.com (M.C.); wangxia1698@163.com (X.W.); wangmin\_620@126.com (M.W.); myq\_0437@163.com (Y.M.); cyzhu115@163.com (C.Z.); dengbo.25@163.com (B.D.); whk945hh@163.com (H.W.); chiyukiikuyihc@163.com (S.S.); lfxxtjr@126.com (J.T.); gmf9685@163.com (M.G.)

\* Correspondence: yiyi\_han@126.com (Y.H.); dosfeng@hotmail.com (D.F.); Tel.: +86-021-59804480 (Y.H.); +86-021-59804366 (D.F.)

**Table S1.** Comparison table of LUMTECH MPFC-QuEChERS purification column.

| Purification Column Name                                      | Applicable Conditions                                                                    | Applicable Matrix          |                                                                                                                                                        |
|---------------------------------------------------------------|------------------------------------------------------------------------------------------|----------------------------|--------------------------------------------------------------------------------------------------------------------------------------------------------|
| LUMTECH MPFC-QuEChERSpurificati on column (simple substrate)  | Suitable for matrix containing organic acids, some sugars, and a small amount of pigment | Melons                     | cucumber<br>squash, zucchini, bitter melon, loofah, etc.<br>winter squash, pumpkin, winter squash, etc.                                                |
|                                                               |                                                                                          | Leafy vegetables           | Chinese cabbage                                                                                                                                        |
|                                                               |                                                                                          | Nightshade                 | tomato                                                                                                                                                 |
|                                                               |                                                                                          | Beans                      | vegetable soybeans, broad beans, peas, lima beans, etc.                                                                                                |
|                                                               |                                                                                          | Stem                       | asparagus, lettuce, rhubarb, etc.                                                                                                                      |
|                                                               |                                                                                          | Sprouts                    | mung bean sprouts, soybean sprouts, radish sprouts                                                                                                     |
|                                                               |                                                                                          | Bulbs                      | garlic, onion, leek, lily, etc.<br>leek, green onion, green garlic, garlic sprout, etc.<br>cabbage, Brussels sprouts, Brussels sprouts, etc.           |
|                                                               |                                                                                          | Brassica                   | chinese kale, chinese cabbage, chinese cabbage, stem mustard, etc.                                                                                     |
|                                                               |                                                                                          | Leafy vegetables           | spinach<br>chinese cabbage, small rapeseed, greengrocery<br>carrots, beet leaves, chrysanthemum, lettuce,<br>celery, celery, fennel, bulb fennel, etc. |
|                                                               |                                                                                          | Nightshade                 | eggplant, chili, sweet pepper, okra, physalis, etc.                                                                                                    |
| LUMTECH MPFC-QuEChERSpurificati on column (complex substrate) | Suitable for higher pigment content in the matrix                                        | Beans                      | cowpeas, kidney beans, podded peas, lentils<br>radish, carrot, beetroot                                                                                |
|                                                               |                                                                                          | Rhizomes and taro          | potato<br>sweet potato, yam, burdock seed, cassava, taro, kudzu,<br>konjac, etc.                                                                       |
|                                                               |                                                                                          | Aquatic                    | water cress, rice white, cattail, etc.<br>water chestnut, gorgon, etc.                                                                                 |
|                                                               |                                                                                          | Other perennial vegetables | lotus root, water chestnut, sage, etc.<br>pepper buds, toon buds, etc.                                                                                 |
|                                                               |                                                                                          |                            | daylily, bamboo shoots, cactus, chrysanthemum, etc.                                                                                                    |

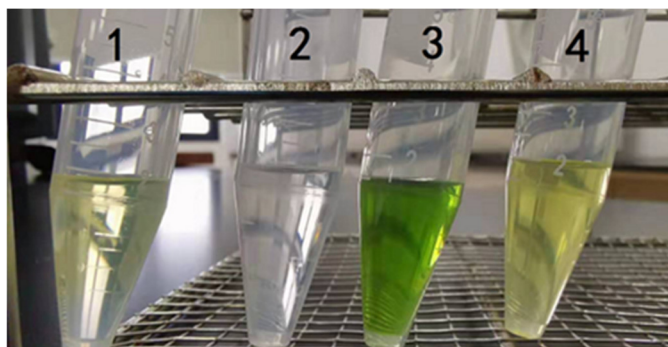

**Figure S1.** Color comparison diagrams of purification solutions (green grocery) corresponding to different methods. 1—purification solution made by NANO CARB; 2—purification solution made by m-PFC1 (complex matrix); 3—purification solution made by QuiClear, 4—purification solution made by conventional QuEChERS treatment.
